# Supplementary material for: Genetic diversity of variants involved in drug response and metabolism in Sri Lankan populations: implications for clinical implementation of pharmacogenomics
Source: PubMed Central journal article supplement — Pharmacogenet Genomics. 2015 Dec 9;26(1):28–39. doi: 10.1097/FPC.0000000000000182 (PMC4890825; doi:10.1097/fpc.0000000000000182), 2015-12-09
Supplement: fpc-26-28-s002.pdf [file fpc-26-28-s002.pdf]

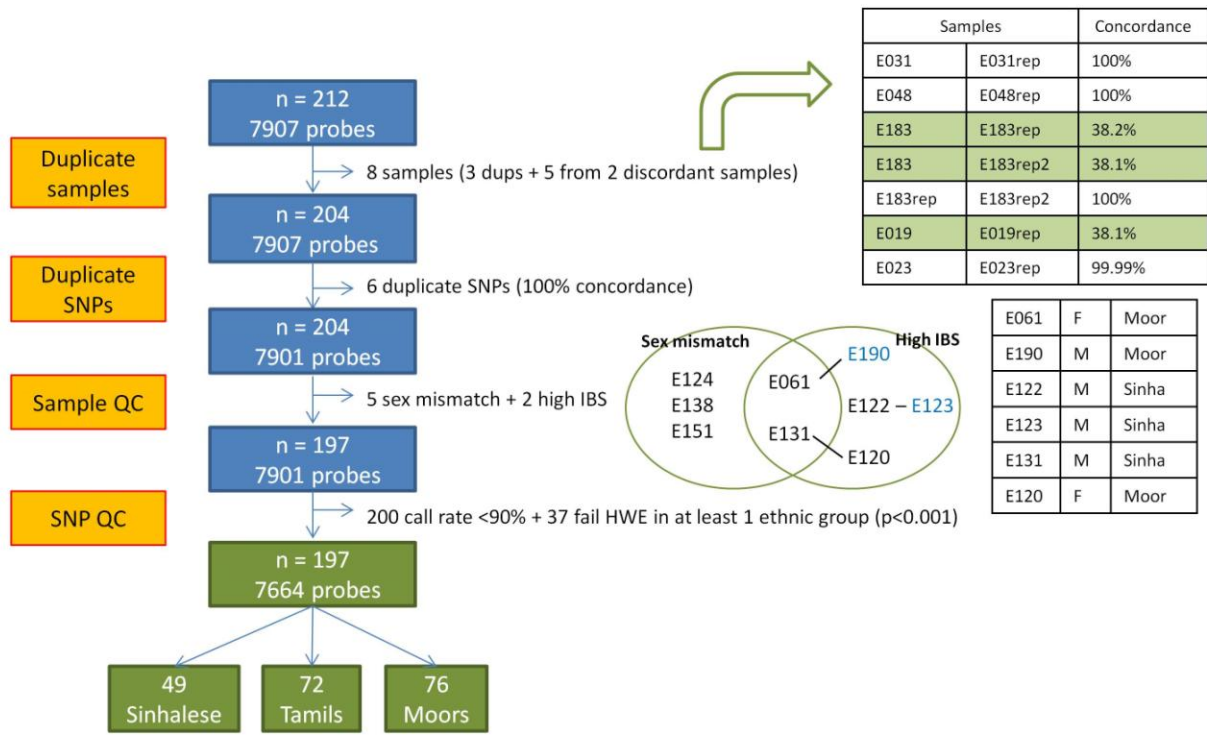

### Flowchart of QC procedures on Sri Lankan dataset

Dups: duplicates, IBS: identity by state, HWE: Hardy Weinberg Equilibrium, Sinha: Sinhalese

All replicates of samples E183 and E019 were removed while the replicates with lower call rate for samples E031, E048 and E023 were removed. To retain as many samples as possible, we retained E190 and E123 (highlighted in blue) since both samples in the high IBS pairs belonged to the same ethnic group. Lines between sample names indicate pairs of samples with excessive IBS.
