# Supplementary material for: Genetic diversity of variants involved in drug response and metabolism in Sri Lankan populations: implications for clinical implementation of pharmacogenomics
Source: PubMed Central journal article supplement — Pharmacogenet Genomics. 2015 Dec 9;26(1):28–39. doi: 10.1097/FPC.0000000000000182 (PMC4890825; doi:10.1097/fpc.0000000000000182), 2015-12-09
Supplement: fpc-26-28-s003.pdf [file fpc-26-28-s003.pdf]

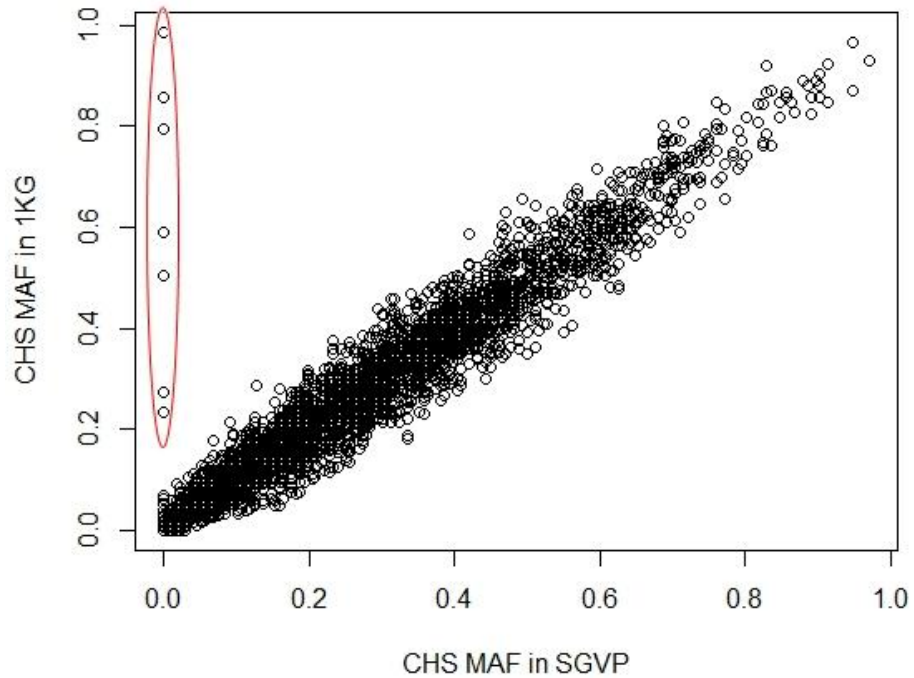

**Concordance between MAF in SGVP CHS and 1000 genomes CHS after merging SGVP and 1000 genomes datasets**

This plot shows the correlation of minor allele frequencies (MAF) in SGVP CHS and 1000 genomes CHS, who are expected to be genetically similar to SGVP CHS. 7 SNPs with substantially different MAFs (circled in red) were removed (see Supplemental Digital Content 1).
