# Supplementary material for: Genetic diversity of variants involved in drug response and metabolism in Sri Lankan populations: implications for clinical implementation of pharmacogenomics
Source: PubMed Central journal article supplement — Pharmacogenet Genomics. 2015 Dec 9;26(1):28–39. doi: 10.1097/FPC.0000000000000182 (PMC4890825; doi:10.1097/fpc.0000000000000182), 2015-12-09
Supplement: fpc-26-28-s004.pdf [file fpc-26-28-s004.pdf]

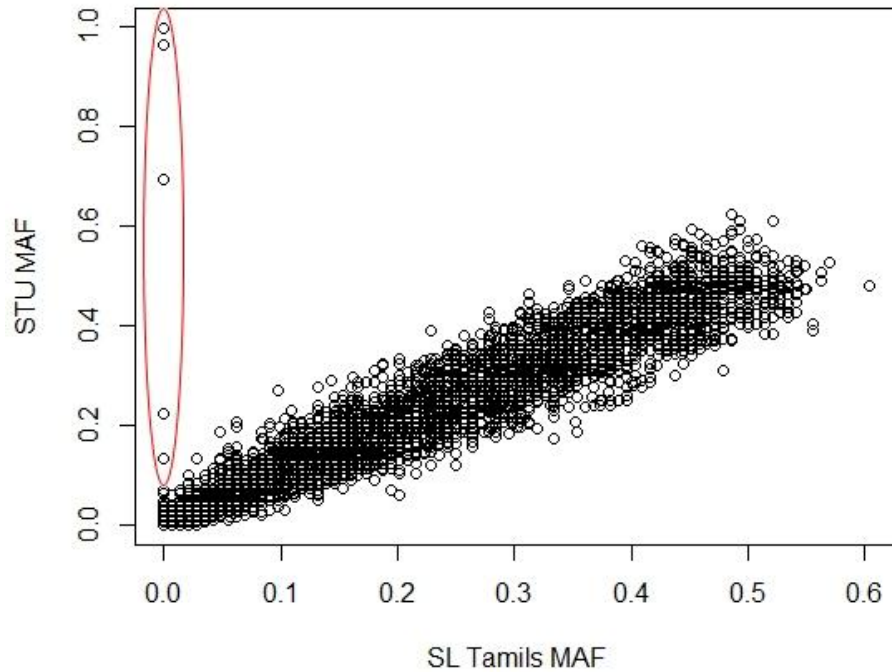

### **Concordance between MAF in SL Tamils and STU after merging all datasets**

This plot shows the correlation between minor allele frequencies (MAF) of SNPs in SL Tamils and 1000 genomes STU, who are expected to be genetically identical. SNPs with  $F_{ST} > 0.05$  between Sri Lanka and STU were flagged for re-genotyping, including those circled in red (See Supplemental Digital Contents 1 & 5).
