# Supplementary material for: Genetic diversity of variants involved in drug response and metabolism in Sri Lankan populations: implications for clinical implementation of pharmacogenomics
Source: PubMed Central journal article supplement — Pharmacogenet Genomics. 2015 Dec 9;26(1):28–39. doi: 10.1097/FPC.0000000000000182 (PMC4890825; doi:10.1097/fpc.0000000000000182), 2015-12-09
Supplement: fpc-26-28-s006.pdf [file fpc-26-28-s006.pdf]

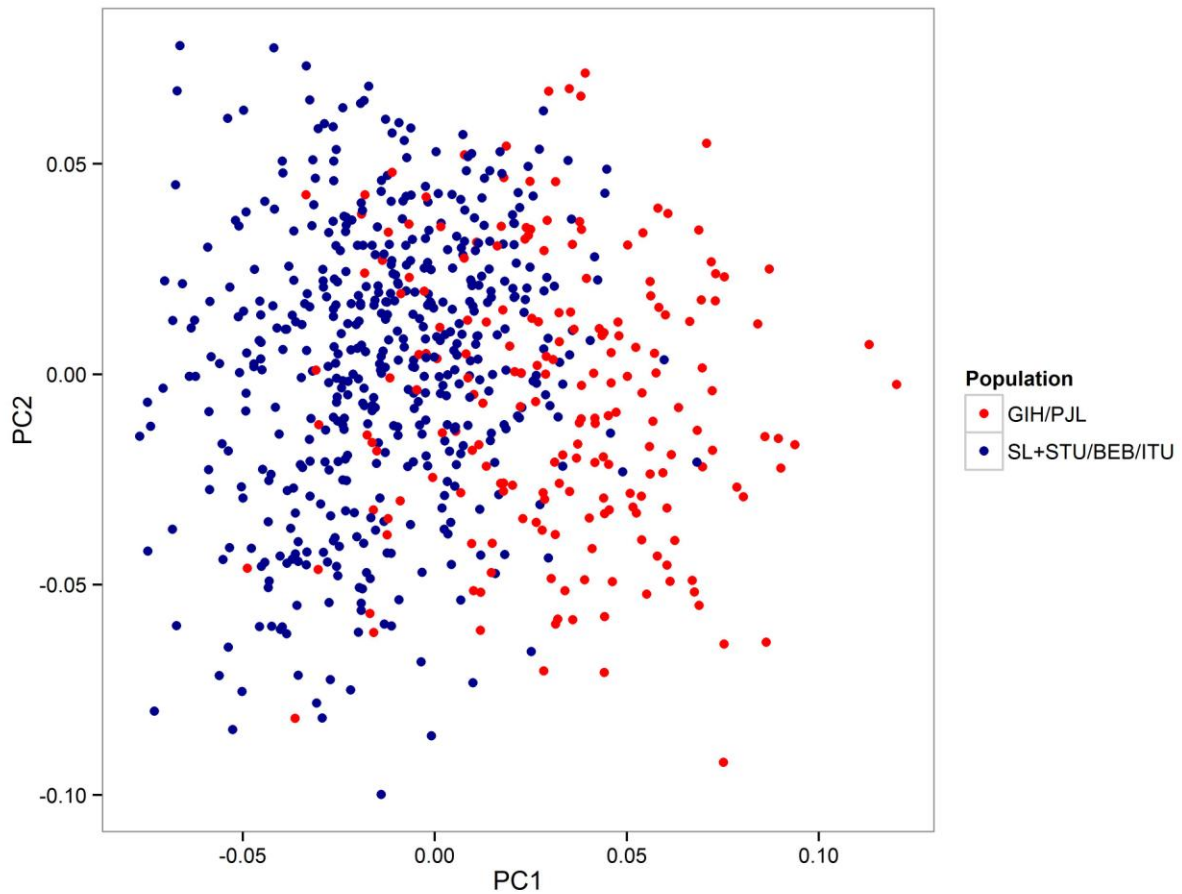

### PCA plot of SL and SAS populations

This is a reproduction of Figure 2B in 2 colours to show the shift of GIH and PJL against the other SL and SAS populations. The shift suggests slight genetic differences but the lack of distinct clusters suggests common ancestral links.
